1 **Title:**

2 FGF21 protects against hepatic lipotoxicity and macrophage activation to attenuate  
3 fibrogenesis in nonalcoholic steatohepatitis

4

5 **Authors and Affiliations:**

6 Cong Liu<sup>1,2</sup>, Milena Schönke<sup>1,2</sup>, Borah Spoorenberg<sup>1,2</sup>, Joost M. Lamboij<sup>3,4</sup>, Hendrik J.P.  
7 van der Zande<sup>3</sup>, Enchen Zhou<sup>1,2</sup>, Maarten E. Tushuizen<sup>5</sup>, Anne-Christine Andréasson<sup>6</sup>,  
8 Andrew Park<sup>7</sup>, Stephanie Oldham<sup>8</sup>, Martin Uhrbom<sup>6</sup>, Ingela Ahlstedt<sup>6</sup>, Yasuhiro Ikeda<sup>7</sup>,  
9 Kristina Wallenius<sup>6</sup>, Xiao-Rong Peng<sup>6</sup>, Bruno Guigas<sup>3</sup>, Mariëtte R. Boon<sup>1,2</sup>, Yanan Wang<sup>9,\*</sup>,  
10 Patrick C.N. Rensen<sup>1,2,9,\*</sup>

11

12 <sup>1</sup>Department of Medicine, Division of Endocrinology, Leiden University Medical Center,  
13 Leiden, The Netherlands. <sup>2</sup>Eindhoven Laboratory for Experimental Vascular Medicine,  
14 Leiden University Medical Center, Leiden, The Netherlands. <sup>3</sup>Department of Parasitology,  
15 Leiden University Medical Center, Leiden, The Netherlands. <sup>4</sup>Department of Cell and  
16 Chemical Biology, Leiden University Medical Center, Leiden, The Netherlands. <sup>5</sup>Department  
17 of Gastroenterology and Hepatology, Leiden University Medical Center, Leiden, The  
18 Netherlands. <sup>6</sup>Bioscience Metabolism, Research and Early Development, Cardiovascular,  
19 Renal and Metabolism (CVRM), BioPharmaceuticals R&D, AstraZeneca, Gothenburg,  
20 Sweden. <sup>7</sup>Biologics Engineering and Targeted Delivery, Oncology R&D, AstraZeneca,  
21 Gaithersburg, USA. <sup>8</sup>Bioscience Metabolism, Research and Early Development,  
22 Cardiovascular, Renal and Metabolism (CVRM), BioPharmaceuticals R&D, AstraZeneca,  
23 Gaithersburg, USA. <sup>9</sup>Med-X institute, Center for Immunological and Metabolic Diseases,  
24 and Department of Endocrinology, First Affiliated Hospital of Xi'an Jiaotong University, Xi'an  
25 Jiaotong University, Xi'an, China.

26 \*Corresponding authors

27 **Contact information of corresponding authors:**

28 Yanan Wang, PhD

29 Address: Department of Endocrinology, The First Affiliated Hospital of Xi'an Jiaotong

30 University, 277 West Yanta Road, Xi'an, Shaanxi, China

31 Phone number: +86-29-85323338

32 E-mail: [y\\_wang@xjtufh.edu.cn](mailto:y_wang@xjtufh.edu.cn)

33

34 Patrick C.N. Rensen, PhD

35 Address: Department of Medicine, Division of Endocrinology, Leiden University Medical

36 Center, P.O. Box 9600, 2300 RC Leiden, The Netherlands

37 Phone number: +31-(0)71-52-63078

38 E-mail: [p.c.n.rensen@lumc.nl](mailto:p.c.n.rensen@lumc.nl)

39 **Abstract**

40 Analogues of the hepatokine FGF21 are in clinical development for type 2 diabetes and  
41 nonalcoholic steatohepatitis (NASH) treatment. Although their glucose-lowering and insulin-  
42 sensitizing effects have been largely unraveled, the mechanisms by which they alleviate  
43 liver injury have only been scarcely addressed. Here, we aimed to unveil the mechanisms  
44 underlying the protective effects of FGF21 on NASH using APOE\*3-Leiden.CETP mice, a  
45 well-established model for human-like metabolic diseases. Liver-specific FGF21  
46 overexpression was achieved in mice, followed by administration of a high-fat high-  
47 cholesterol diet for 23 weeks. FGF21 prevented hepatic lipotoxicity, accompanied by  
48 activation of thermogenic tissues and attenuation of adipose tissue inflammation,  
49 improvement of hyperglycemia and hypertriglyceridemia, and upregulation of hepatic  
50 programs involved in fatty acid oxidation and cholesterol removal. Furthermore, FGF21  
51 inhibited hepatic inflammation, as evidenced by reduced Kupffer cell (KC) activation,  
52 diminished monocyte infiltration and lowered accumulation of monocyte-derived  
53 macrophages. Moreover, FGF21 decreased lipid- and scar-associated macrophages, which  
54 correlated with less hepatic fibrosis as demonstrated by reduced collagen accumulation.  
55 Collectively, hepatic FGF21 overexpression limits hepatic lipotoxicity, inflammation and  
56 fibrogenesis. Mechanistically, FGF21 blocks hepatic lipid influx and accumulation through  
57 combined endocrine and autocrine signaling, respectively, which prevents KC activation  
58 and lowers the presence of lipid- and scar-associated macrophages to inhibit fibrogenesis.

59

60 **Keywords:** fibroblast growth factor 21; steatohepatitis; lipid/scar-associated macrophages;  
61 liver-adipose tissue crosstalk

62 **Grant support:**

63 This work was supported by the Dutch Diabetes Research Foundation (2015.81.1808 to  
64 M.R.B.); Netherlands Organisation for Scientific Research-NWO (VENI grant 91617027 to  
65 Y.W.); Chinese Scholarship Council grants (CSC 201606010321 to E.Z.); the Novo Nordisk  
66 Foundation (NNF18OC0032394 to M.S.); and the Netherlands Cardiovascular Research  
67 Initiative: an initiative with support of the Dutch Heart Foundation (CVON-GENIUS-2 to  
68 P.C.N.R.).

## 69 **Introduction**

70 The liver is the nexus of many metabolic pathways, including those of glucose, fatty acids  
71 (FAs) and cholesterol. In health, these metabolites are distributed to peripheral tissues  
72 while preventing long-lasting accumulation in the liver. In a pathological state, however,  
73 lipids may accrue in the liver, thereby impairing liver function and carving the path towards  
74 the development of nonalcoholic fatty liver disease (NAFLD) (1). NAFLD is considered a  
75 spectrum of liver diseases ranging from liver steatosis, characterized by lipid accumulation  
76 in hepatocytes, to nonalcoholic steatohepatitis (NASH) with hepatic steatosis, lobular  
77 inflammation, hepatocyte ballooning and varying degrees of fibrosis (2, 3). Patients  
78 diagnosed with NASH are predisposed to developing cirrhosis and hepatocellular  
79 carcinoma, among whom patients with severe liver fibrosis are at greatest risk of overall-  
80 and liver-related mortality (4). Despite this, there are currently no approved pharmaceutical  
81 therapeutics for NASH. Instead, lifestyle modifications remain the first-line treatment for  
82 NASH, although this is rarely attainable in the long term, and liver transplantation is still the  
83 sole intervention to treat the end-stage of NASH (2, 5). Thus, there is an unmet need for  
84 therapeutic strategies that control the progression of NASH, in particular of liver fibrosis,  
85 and reverse the underlying pathophysiology.

86

87 Current hypotheses suggest that adipose tissue dysfunction and lipid spillover leads to  
88 hepatic lipotoxicity, and thereby the initiation of NASH (6, 7), which further progresses  
89 through the inflammatory response triggered by hepatic lipotoxicity (7). This inflammatory  
90 response and subsequent fibrogenesis are primarily initiated by liver macrophages (8).  
91 Hepatic macrophages mainly consist of embryonically-derived macrophages, termed  
92 resident Kupffer cells (ResKCs), and monocyte-derived macrophages (MoDMacs) that are  
93 recruited from the circulation (9). In the steady state, ResKCs serve as sentinels for liver  
94 homeostasis. In NASH, liver injury caused by excess lipids and hepatocyte damage/death,

95 triggers ResKC activation, leading to pro-inflammatory cytokine and chemokine release (10).  
96 This fosters the infiltration of newly-recruited monocytes into the liver, which gives rise to  
97 various pro-inflammatory and pro-fibrotic macrophage subsets (8, 10). Interestingly, recent  
98 preclinical and clinical studies have reported that modulation of ResKC activation, monocyte  
99 recruitment or macrophage differentiation, to some extent, can attenuate NASH (8, 11). In  
100 light of these findings, FGF21, a hepatokine with both lipid-lowering and anti-inflammatory  
101 properties (12, 13), has been brought to the foreground as a promising potential therapeutic  
102 to treat NASH.

103

104 The specificity of FGF21 action for various metabolic tissues is determined by the FGF  
105 receptor (FGFR) which forms a heterodimer with the transmembrane co-receptor  $\beta$ -Klotho  
106 (KLB) (14, 15). While the FGFR is ubiquitously expressed, KLB is primarily expressed in the  
107 liver and adipose tissue (14, 15), therefore possibly limiting FGF21 action to these tissues.  
108 Physiologically, FGF21 is considered a stress-induced hormone whose levels rise in  
109 metabolically compromised states, such as obesity (16) and NASH (17). The increased  
110 FGF21 in these pathologies is likely induced by an accumulation of lipids in the liver (18).  
111 As such, plasma FGF21 also positively correlates with the severity of steatohepatitis and  
112 fibrosis in patients with NASH (17). Induction of FGF21 is thought to mediate a  
113 compensatory response to limit metabolic dysregulation (19), although this level is not  
114 sufficient. Interestingly, two phase 2a clinical trials reported that pharmacological FGF21  
115 treatment improves liver steatosis in NASH patients (20, 21). While an *in vivo* study testing  
116 the therapeutic potency of FGF21 in choline-deficient and high-fat diet-induced NASH has  
117 previously reported both anti-inflammatory and anti-fibrotic effects (22), detailed  
118 mechanistic understanding is still lacking.

119

120 In the present study, we aimed to elucidate the mechanisms underlying FGF21-mediated  
121 improvement of NASH, in particular of steatohepatitis and fibrogenesis. To this end, we  
122 used APOE\*3-Leiden.CETP mice, a well-established model for human cardiometabolic  
123 diseases. These mice exhibit human-like lipoprotein metabolism, develop hyperlipidemia,  
124 obesity and inflammation when fed a high-fat high-cholesterol diet (HFCD), and develop  
125 fibrotic NASH closely resembling clinical features that accompany NASH in humans (23,  
126 24). Moreover, these mice show human-like responses to both lipid-lowering and anti-  
127 inflammatory therapeutics during the development of metabolic syndrome (25-28). Here,  
128 we show that specific overexpression of FGF21 in the liver, resulting in increases  
129 circulating FGF21 levels, activates hepatic signaling associated with FA oxidation and  
130 cholesterol removal. In parallel, FGF21 activates thermogenic tissues and reduces  
131 adipose tissue inflammation, thereby protecting against adipose tissue dysfunction,  
132 hyperglycemia and hypertriglyceridemia. As a consequence, FGF21 largely limits lipid  
133 accumulation in the liver and potently blocks hepatic KC activation and monocyte  
134 recruitment, thereby preventing the accumulation of pro-inflammatory macrophages in the  
135 liver. In addition, FGF21 reduced the number of pro-fibrotic macrophages in the injured  
136 liver, potentially explaining why FGF21 counteracts all features of NASH, including hepatic  
137 steatosis, inflammation and fibrogenesis.

138 **Results**

139 **Liver-specific FGF21 overexpression increases circulating FGF21 levels and protects**  
140 **against HFCD-induced body fat mass gain**

141 We aimed to elucidate the underlying mechanisms of FGF21-mediated hepatoprotective  
142 effects on NASH, by using APOE\*3-Leiden.CETP mice fed with a HFCD, a model that  
143 induces all stages of NASH in a human-like fashion and recapitulates the ultrastructural  
144 changes observed in NASH patients (23, 24). Since the liver is the main contributor to  
145 circulating FGF21 (14), we employed an adeno-associated virus vector 8 (AAV8) vector  
146 expressing codon-optimized FGF21 to induce liver-specific FGF21 overexpression in  
147 APOE\*3-Leiden.CETP mice. Mice treated with either AAV8-FGF21 or AAV8-null as controls  
148 were fed with a HFCD for 23 weeks (**Figure 1A**). We confirmed liver-specific FGF21  
149 overexpression by a large increase in *Fgf21* expression in the liver but not in adipose tissue,  
150 resulting in high circulating FGF21 levels that persisted throughout the study (**Figure 1B**).  
151 HFCD progressively and profoundly increased body weight over the experimental period,  
152 accompanied by increased white adipose tissue (WAT) and brown adipose tissue (BAT)  
153 weights relative to those of low fat low cholesterol (LFCD)-fed mice (**Figure 1C,D**). In  
154 favorable contrast, FGF21 reduced body weight in the first 3 weeks, after which body  
155 weight stabilized and remained lower than that of LFCD- and HFCD-fed mice by the end of  
156 the study (-18% and -35%, respectively; **Figure 1C**). Concomitantly, FGF21 decreased  
157 weights of gonadal WAT (gWAT; -67%), subcutaneous WAT (sWAT; -55%), interscapular  
158 BAT (iBAT; -41%) and subscapular BAT (-41%) to levels comparable to those observed in  
159 LFCD-fed mice (**Figure 1D**). These findings thus highlight the potent effects of FGF21 on  
160 preventing fat mass gain under NASH-inducing dietary conditions.

161

162 **FGF21 protects against HFCD-induced adipose tissue dysfunction**



163 The profound fat mass-lowering effects of liver-derived FGF21 prompted us to examine its  
164 role in adipose tissue function. Since we and others have previously shown that FGF21  
165 activates thermogenic adipose tissues (29, 30), we first performed histological analyses of  
166 BAT and sWAT, the adipose tissue that is most prone to browning (31). We observed that  
167 FGF21 prevented the HFCD-induced lipid overload in BAT (-66%) and increased  
168 uncoupling protein-1 (UCP-1) expression compared with both the LFCD- and HFCD-fed  
169 groups (+15% and +26%, respectively) (**Figure 2A**). In sWAT, FGF21 prevented HFCD-  
170 induced adipocyte hypertrophy (-41%), and increased the UCP-1 content (+94%) (**Figure**  
171 **2B**). Among the adipose tissue depots, gWAT is most prone to diet-induced inflammation,  
172 and surgical removal of inflamed gWAT attenuates NASH in obese mice (32). Similar to  
173 sWAT, FGF21 protected against HFCD-induced adipocyte enlargement (-52%) in gWAT  
174 and in addition fully prevented the formation of crown-like structures (CLSs; -93%) (**Figure**  
175 **2C**). In agreement with these findings, FGF21 suppressed the HFCD-induced expression of  
176 adhesion G protein-coupled receptor E1 (*Adgre1*; -56%), encoding the macrophage surface  
177 marker F4/80, in addition to decreased expression of the pro-inflammatory mediators tumor  
178 necrosis factor  $\alpha$  (*Tnfa*; -60%), interleukin-1 $\beta$  (*Il1b*; -50%) and monocyte attractant  
179 chemokine C–C motif ligand 2 (*Ccl2*; -60%) (**Figure 2D**). Besides, FGF21 tended to  
180 upregulate *Klb* (+33%) and *Fgfr1* (+ 30%) expression compared to HFCD-fed mice (**Figure**  
181 **2-figure supplement 1**). Moreover, consistent with the critical role of adiponectin in  
182 mediating the therapeutic benefits of FGF21 in adipose tissue(22, 33), FGF21 increased  
183 plasma adiponectin levels compared to both LFCD- and HFCD-fed mice (+93% and +133%,  
184 respectively; **Figure 2E**). These combined findings thus indicate that FGF21 prevents  
185 HFCD-induced adipose tissue dysfunction during NASH development.

186

187 **FGF21 alleviates HFCD-induced hyperglycemia and hypertriglyceridemia**

188 We next examined whether FGF21 confers its glucose and lipid lowering effects during  
189 NASH development. While HFCD induced hyperglycemia as compared to LFCD, FGF21  
190 normalized fasting plasma glucose compared to LFCD, which was accompanied by lower  
191 glucose excursion after an intraperitoneal glucose tolerance test (**Figure 3A,B**). In addition,  
192 FGF21 normalized the plasma insulin and Homeostatic Model Assessment for Insulin  
193 Resistance index (**Figure 3C**), indicating that FGF21 restores insulin sensitivity to that  
194 observed in LFCD-fed mice. FGF21 did not prevent the HFCD-induced increase of plasma  
195 total cholesterol (TC) levels (**Figure 3-figure supplement 1A**), nor the distribution of  
196 cholesterol over the various lipoproteins (**Figure 3-figure supplement 1B**). Nonetheless,  
197 FGF21 strongly and consistently reduced fasting plasma triglyceride (TG) levels throughout  
198 the experimental period compared with LFCD- and HFCD-fed mice (-67% and -58%; at  
199 week 22), which was specific for very-low density lipoprotein (VLDL) and low density  
200 lipoprotein (LDL) (**Figure 3D**). In addition, an oral lipid tolerance test revealed that FGF21  
201 prevented HFCD-induced lipid intolerance (**Figure 3E**). Taken together, FGF21 prevents  
202 the HFCD-induced increase in circulating glucose and reduces circulating TG levels beyond  
203 those observed in LFCD-fed mice.

204

### 205 **FGF21 protects against HFCD-induced hepatic steatosis, inflammation, and** 206 **fibrogenesis**

207 Then, we investigated the effects of FGF21 on liver steatosis, inflammation and fibrosis.  
208 FGF21 not only prevented HFCD-induced liver weight gain (-58%), but even reduced liver  
209 weight to a level lower than that of LFCD-fed mice (-40%; **Figure 4A,F**). Moreover, FGF21  
210 abolished the HFCD-induced increase in steatosis, lobular inflammation and hepatocellular  
211 ballooning (**Figure 4B, Figure 4-figure supplement 1A,B**). Therefore, FGF21 completely  
212 prevented the HFCD-induced large increase in the NAFLD activity score (-74%; **Figure**  
213 **4C,F**). Furthermore, FGF21 prevented collagen accumulation in the liver as assessed by

214 Picrosirius Red staining (-58%; **Figure 4D,F**). We then measured hepatic concentration of  
215 hydroxyproline, a major constituent of collagen and thus a marker of extracellular matrix  
216 accumulation. In line with the hepatic collagen content, HFCD feeding increased the hepatic  
217 hydroxyproline content, which was prevented by FGF21 (-49%; **Figure 4E**). Taken together,  
218 our data demonstrate that FGF21 protects against HFCD-induced hepatosteatosis,  
219 steatohepatitis as well as fibrogenesis.

220

### 221 **FGF21 abolishes liver lipotoxicity, accompanied by activation of hepatic signaling** 222 **involved in FA oxidation and cholesterol removal**

223 In the context of NASH, pro-inflammatory responses and fibrogenesis occur when  
224 hepatocytes are injured by lipotoxicity (7, 34). Indeed, 23 weeks of HFCD feeding promoted  
225 aberrant accumulation of TG as well as TC in the liver (**Figure 5A**). In agreement with the  
226 data presented in **Figure 4**, FGF21 abrogated the HFCD-induced increase in hepatic TG  
227 levels (-62%) and tended to decrease hepatic TC levels (-22%), resulting in smaller lipid  
228 droplets (**Figure 5A**). In addition to reduced lipid overflow from WAT, we reasoned that  
229 FGF21 may also directly act on the liver to prevent HFCD-induced liver lipotoxicity. In  
230 agreement, compared to both LFCD- and HFCD-fed mice, FGF21 profoundly upregulated  
231 the expression of *Klb* (+150% and +223%), *Fgfr1* (+57% and +79%), *Fgfr2* (+97% and  
232 +77%), and *Fgfr4* (+53% and +67%) (**Figure 5-figure supplement 1**). We next quantified  
233 the hepatic expression of key genes involved in FA and cholesterol handling. FGF21 did not  
234 attenuate the HFCD-induced increased expression of FA translocase cluster of  
235 differentiation 36 (*Cd36*) (**Figure 5-supplement 2A**). In favorable contrast, compared to  
236 both LFCD- and HFCD-fed mice, FGF21 did increase the expression of carnitine palmitoyl  
237 transferase 1 $\alpha$  (*Cpt1a*, +66% and +53%), peroxisome proliferator-activated receptor  $\alpha$   
238 (*Ppara*, +67% and +53%) and peroxisome proliferator-activated receptor  $\gamma$  coactivator 1 $\alpha$   
239 (*Pgc1a*; +188% and +225%), all of those genes being key players involved in FA oxidation

240 **(Figure 5B)**. Moreover, compared to LFCD- and HFCD-fed mice, FGF21 increased the  
241 expression of apolipoprotein B (*Apob*, +26% and +38%), which is involved in VLDL  
242 secretion **(Figure 5-figure supplement 2B)**. Furthermore, FGF21 upregulated the  
243 expression of ATP-binding cassette transporter G member 5 (*Abcg5*; 7-fold and 2-fold),  
244 crucial for biliary secretion of neutral sterols **(Figure 5C)**, increased the expression of  
245 cholesterol 7 $\alpha$ -hydroxylase (*Cyp7a1*; +94% and +109%), a key gene involved in the classic  
246 bile acid synthesis pathway **(Figure 5D)**, and restored the expression of sterol 27-  
247 hydroxylase (+38%), involved in the alternative bile acid pathway **(Figure 5D)**. Considering  
248 that bile acid synthesis is a major pathway for hepatic cholesterol disposal (35), FGF21  
249 likely regulates bile acid metabolism to prevent HFCD-induced cholesterol accumulation in  
250 the liver. Collectively, our data indicate that FGF21 increases the hepatic expression of key  
251 genes involved in  $\beta$ -oxidation and cholesterol removal, which together with reduced lipid  
252 overload from WAT may explain FGF21-induced alleviation of liver lipotoxicity under NASH-  
253 inducing dietary conditions.

254

### 255 **FGF21 prevents activation of various KC subsets**

256 Then, we performed an in-depth phenotyping of hepatic immune cells using spectral flow  
257 cytometry. For this, we developed a panel that identifies most major immune cell subsets  
258 (for gating strategy see **Figure 6-figure supplement 1A**). As compared to LFCD, HFCD  
259 tended to reduce total CD45<sup>+</sup> leukocytes, which were increased by FGF21 **(Figure 6-figure**  
260 **supplement 1B)**. Combining conventional gating and dimension-reduction analysis through  
261 uniform manifold approximation and projection allowed to identify FGF21-induced changes  
262 in cell subset abundance **(Figure 6A)**. FGF21 prevented HFCD-induced loss of eosinophils,  
263 neutrophils and B cells, and increased numbers of dendritic cells and T cells compared with  
264 those observed in both LFCD- and HFCD-fed mice **(Figure 6-figure supplement 1B)**.  
265 More importantly, FGF21 increased the number of total KCs compared with that of both

266 LFCD- and HFCD-fed mice (+63% and +156; **Figure 6-figure supplement 1B**), attenuated  
267 HFCD-induced monocyte recruitment (-18%), and tended to repress the HFCD-induced  
268 increase in hepatic MoDMacs (-42%; **Figure 6-figure supplement 1B**).

269

270 During the development of NASH, MoDMacs can gradually seed in KC pool by acquiring  
271 ResKCs identity and replacing the dying ResKCs (36). These recruited MoKCs can have  
272 both detrimental and supportive roles, contributing to increase in pathology during fibrosis  
273 onset, but hastening recovery when the damage-evoking agent is attenuated/removed (37).  
274 In light of this, we assessed the abundance and phenotype of ResKCs and monocyte-  
275 derived KCs (MoKCs). We observed that FGF21 completely abolished the HFCD-induced  
276 reduction of the number of ResKCs (+319%) and potently protected against HFCD-induced  
277 ResKC activation as shown by decreased proportion of CD11c<sup>+</sup> ResKCs (-53%; **Figure 6B**).  
278 FGF21 also completely abolished the HFCD-induced upregulation of CD36 in ResKCs, to  
279 levels that are even lower than those in LFCD-fed mice (-88% vs. LFCD; -94% vs. HFCD;  
280 **Figure 6B**). In addition, FGF21 increased the number of MoKCs compared with that of both  
281 LFCD- and HFCD-fed mice (+92% and +123%), and prevented the HFCD-induced increase  
282 in the abundance of CD11c<sup>+</sup> MoKCs (-42%) (**Figure 6C**). Strikingly, compared to both  
283 LFCD- and HFCD-fed mice, FGF21 downregulated CD9 (-32% and -49%) and CD36 (-98%  
284 and -100%) in MoKCs (**Figure 6C**). Furthermore, FGF21 profoundly repressed HFCD-  
285 induced upregulation of hepatic *Tnfa* (-37%), *Il1b* (-41%) and *Ccl2* (-54%) expression to  
286 levels comparable to those in LFCD-fed mice (**Figure 6D**), which is in line with the  
287 observation that FGF21 prevents KC activation. Given that CD36<sup>hi</sup> ResKCs and CD36<sup>hi</sup>/  
288 CD9<sup>hi</sup> MoKCs are involved in the formation of hepatic CLSs(10, 37-39), we next assessed  
289 CLSs and observed that FGF21 completely prevented the HFCD-induced formation of  
290 CLSs in the liver (-93%; **Figure 6D**). These data demonstrate that FGF21 inhibits the  
291 activation of ResKCs and MoKCs and prevents the accumulation of CD36<sup>hi</sup> ResKCs and

292 CD36<sup>hi</sup>/CD9<sup>hi</sup> MoKCs under dietary conditions that result in NASH, which likely contribute  
293 to the beneficial effects of FGF21 on hepatic inflammation and fibrosis.

294

295 **FGF21 protects against COL1A1 accumulation, as predicted by the reduction of**  
296 **CD36<sup>hi</sup> KCs and CD9<sup>hi</sup> KCs**

297 To further evaluate whether FGF21-induced reductions of lipid-associated macrophages  
298 (i.e., CD36<sup>hi</sup> ResKCs and CD36<sup>hi</sup> MoKCs) (38) and scar-associated macrophages (i.e.,  
299 CD9<sup>hi</sup> MoKCs) (40), are implicated in fibrogenesis, we performed multiple univariate  
300 regression analyses. These revealed that both NAFLD activity and liver fibrosis were  
301 associated with both CD36<sup>hi</sup> ResKCs, CD36<sup>hi</sup> MoKCs and CD9<sup>hi</sup> MoKCs (**Figure 6-figure**  
302 **supplement 2A-D**), indicating that FGF21 likely improves liver fibrosis by reducing these  
303 lipid- and scar-associated macrophages. To further understand the underlying mechanisms  
304 by which FGF21 prevents liver fibrosis, we measured hepatic expression of key genes  
305 involved in fibrogenesis (**Figure 6D**). FGF21 tended to decrease the expression of  
306 connective tissue growth factor (*Ctgf*, -27%), a major fibrogenic factor, and normalized the  
307 HFCD-induced increased expression of its downstream target collagen type I $\alpha$  1 (*Col1a1*; -  
308 61%; **Figure 6D**). This finding was confirmed by immunohistochemistry, revealing that  
309 FGF21 reduced hepatic COL1A1 accumulation (-46%; **Figure 6D**). Furthermore, univariate  
310 regression analysis revealed that COL1A1 expression is predicted by CD36<sup>hi</sup> ResKCs,  
311 CD36<sup>hi</sup> MoKCs and CD9<sup>hi</sup> MoKCs (**Figure 6E, Figure 6-figure supplement 2E**). Taken  
312 together, these data indicate that FGF21 reduces lipid- and scar-associated macrophages  
313 to inhibit COL1A1 synthesis and prevent fibrogenesis.

314 **Discussion**

315 Several FGF21 analogues are currently being evaluated in clinical trials for the treatment of  
316 NASH (20, 21). While the protective effect of pharmacological intervention with long-acting  
317 FGF21 on human liver steatosis has been uncovered (20, 21, 41), mechanisms underlying  
318 attenuated steatosis as well all the anti-inflammatory and anti-fibrotic effects of FGF21 on  
319 NASH are still largely unexplored. Therefore, we set out to elucidate mechanisms by which  
320 FGF21 beneficially modulates these various aspects of NASH in HFCD-fed APOE\*3-  
321 Leiden.CETP mice, a well-established model for diet-induced NASH (23, 24). Based on our  
322 findings, we propose that FGF21 attenuates liver lipotoxicity via endocrine signaling to  
323 adipose tissue to induce thermogenesis, thereby preventing adipose tissue dysfunction to  
324 reduce lipid overflow to the liver, as well as autocrine signaling to the liver to increase FA  
325 oxidation and cholesterol removal. In addition, FGF21 prevents KC activation, monocyte  
326 recruitment and the formation of lipid- and scar-associated macrophages, thereby likely  
327 inhibiting collagen accumulation and alleviating liver fibrogenesis.

328

329 Hepatic lipotoxicity is one of the major risk factors determining the progression of liver  
330 steatosis into NASH, as shown in multiple clinical studies with obese patients (42-44). By  
331 feeding APOE\*3-Leiden.CETP mice a diet rich in fat and cholesterol, we mimicked a  
332 situation in which a positive energy balance induces many aspects of the metabolic  
333 syndrome, including insulin resistance, obesity with increased fat accumulation, and hepatic  
334 lipotoxicity indicated by hepatomegaly with aberrant accumulation of TG as well as TC.  
335 Hepatic lipotoxicity likely results from lipid overflow from insulin-resistant adipose tissue  
336 towards the liver in combination with hepatic insulin resistance that prevents insulin-  
337 stimulated outflow of lipids (45). Within this dietary context, we applied a single  
338 administration of an AAV8 vector encoding codon-optimized FGF21, which resulted in liver-  
339 specific FGF21 overexpression. Since the codon-optimized FGF21 mitigates the poor

340 pharmacokinetic properties of native FGF21, including its short plasma half-life (0.5-2 hours)  
341 by reducing proteolytic degradation(45), an elevated level of circulating FGF21 was  
342 reached throughout the dietary intervention period. By this strategy, we mimicked the  
343 situation in which circulating FGF21 predominantly derives from the liver (46). Indeed,  
344 circulating FGF21 correlates well with the hepatic expression of FGF21 (47). Interestingly,  
345 hepatic expression of FGF21 fully prevented the diet-induced increase in liver weight, liver  
346 lipids (i.e., TG and TC) and steatosis score.

347

348 These lipotoxicity-protective effects of FGF21 can partially be explained by endocrine  
349 effects of liver-derived FGF21 on adipose tissue, which besides the liver has high  
350 expression of  $\beta$ -Klotho, the co-receptor of the FGFR (14, 15). Indeed, FGF21 fully  
351 prevented the HFCD-induced increase in weights of WAT and BAT, with decreased lipid  
352 accumulation in these adipose tissue depots as well as induction of BAT activation and  
353 WAT browning. These data imply that FGF21 greatly induces thermogenesis which highly  
354 increases energy expenditure, consistent with the thermogenic responses observed for  
355 recombinant FGF21 in mice fed with an obesogenic diet (29) or atherogenic diet (30).  
356 Activation of thermogenic tissues by classical  $\beta$ -adrenergic receptor largely increases the  
357 uptake of circulating lipoprotein-derived FAs by BAT and beige WAT (48), which we  
358 recently also demonstrated for recombinant FGF21 (30). This can thus at least partly  
359 explain the marked TG-lowering effect of FGF21 observed in the current study.  
360 Thermogenic activation also increases the uptake and combustion of glucose, although the  
361 glucose-lowering and insulin-sensitizing effects of FGF21 can also be explained by  
362 attenuated WAT inflammation in combination with increased adiponectin expression as well  
363 as improved liver insulin sensitivity (30, 33, 49).

364



365 Besides endocrine FGF21 signaling in adipose tissue, liver lipotoxicity is likely further  
366 prevented by autocrine FGF21 signaling. Indeed, we showed that liver-specific FGF21  
367 overexpression increased hepatic expression of genes involved in FA oxidation (*Cpt1a*,  
368 *Ppara*, *Pgc1a*), biliary cholesterol secretion (*Abcg5*), bile acids synthesis (*Cyp7a1*) and  
369 VLDL production (*Apob*). Of note, these observations are in line with previous reports  
370 showing increased FA oxidation (50) and upregulated *Abcg5* (51), *Cyp7a1* (51, 52) and  
371 *Apob* (30) in the liver upon FGF21 treatment. Altogether, the marked protective effects of  
372 FGF21 on HFCD-induced hepatic lipotoxicity likely results from combined endocrine and  
373 autocrine signaling, leading to reduced lipid influx from adipose tissue to the liver coupled to  
374 the activation of hepatic FA oxidation and cholesterol elimination pathways. Our  
375 observations may likely explain the recent clinical findings that treatment with FGF21  
376 analogues in patients with NASH not only reduced hepatic steatosis (20, 21) but also  
377 increased hepatic bile acid synthesis and further promoted cholesterol removal, lowering  
378 the risk for further hepatic lipotoxicity (53).

379

380 While NASH is initiated by hepatic lipotoxicity, NASH progression is mainly driven by  
381 impaired KC homeostasis and subsequent liver inflammation (54). Therefore, we  
382 investigated in depth the inflammatory response in the liver through a combination of  
383 immunohistochemistry, flow cytometry and gene expression analyses. HFCD feeding  
384 induced an array of inflammatory effects, including increased lobular inflammation,  
385 hepatocyte ballooning and NAFLD activity scores as well as increased inflammatory foci  
386 and CLSs, accompanied by a reduction in ResKCs with a relative increase in CD11c<sup>+</sup>  
387 ResKCs, and an increase in MoDMacs and CD11c<sup>+</sup> MoKCs. These observations are likely  
388 explained by lipotoxicity-related damage to ResKCs, and release of TNF $\alpha$ , IL-1 $\beta$  and MCP-  
389 1 (*Ccl2*), both activating various downstream pro-inflammatory mediators as well as  
390 promoting monocyte recruitment to remodel the KC pool(36, 55) and further exacerbating

391 hepatic inflammation (10, 38, 54, 56, 57). Importantly, FGF21 prevented most of these  
392 HFCD-induced inflammatory responses, as it normalized lobular inflammation, hepatocyte  
393 ballooning and NAFLD activity scores and CLSs, and reduced pro-inflammatory activation  
394 of various KC subsets.

395

396 Fibrosis has been identified as the most important predictor of prognosis in NAFLD patients,  
397 and therefore a main target in experimental pharmacological approaches (58). HFCD  
398 feeding during 23 weeks induced early signs of fibrosis, as evident from an increased  
399 *Col1a1* expression and COL1A1 content, accompanied by an increased content of the  
400 hydroxyproline. Importantly, FGF21 blocked liver fibrogenesis, and decreased the  
401 hydroxyproline content. These alterations were accompanied with reductions in lipid-  
402 associated macrophages (i.e., CD36<sup>hi</sup> ResKCs/MoKCs) (38) and scar-associated  
403 macrophages (i.e., CD9<sup>hi</sup> MoKCs) (40). In fact, when analysing the mouse groups together,  
404 CD36<sup>hi</sup> ResKCs/MoKCs and CD9<sup>hi</sup> MoKCs positively correlated with liver fibrosis as  
405 reflected by hydroxyproline content and COL1A-positive area, suggesting that these lipid-  
406 and scar-associated macrophages are involved in fibrogenesis in our model. Indeed, high  
407 numbers of CD9<sup>hi</sup> macrophages have been found in fibrotic regions of the liver (37, 39, 40,  
408 55), and these cells are able to prime quiescent primary murine hepatic stellate cells to  
409 upregulate the expression of fibrillar collagen through CTGF (40), thereby promoting and  
410 exacerbating liver fibrosis. Therefore, we speculate that FGF21 protects against early liver  
411 fibrosis likely through preventing the accumulation of CD36<sup>hi</sup>/CD9<sup>hi</sup> KCs, thereby inhibiting  
412 activation of hepatic stellate cells to produce collagen.

413

414 In conclusion, hepatic overexpression of FGF21 in APOE\*3-Leiden.CETP mice limits diet-  
415 induced hepatic lipotoxicity, inflammation and fibrogenesis. Through a combination of  
416 endocrine and autocrine signaling, FGF21 reduces hepatic lipid influx and accumulation,

417 respectively. This results in reduced macrophage activation and monocyte recruitment with  
418 less presence of lipid- and scar-associated macrophages, limiting activation of hepatic  
419 stellate cells to produce collagen (for graphic summary see **Figure 6F**). As such, our  
420 studies provide a mechanistic explanation for the hepatoprotective effects of FGF21  
421 analogues in recent clinical trials including reduction in steatosis (20, 21, 53) as well as the  
422 fibrotic marker N-terminal type III collagen pro-peptide (20, 21), and further highlight the  
423 potential of FGF21 for clinical implementation as a therapeutic in the treatment of advanced  
424 NASH.

## 425 **Materials and Methods**

426 Please see the **Supporting Information** for a detailed description of all experimental  
427 procedures.

428

## 429 **Animals and treatments**

430 Male APOE\*3-Leiden.CETP mice (on a C57BL/6J background) were generated as  
431 previously described (59). Mice at the age of 10-12 weeks were group-housed (2-4 mice  
432 per cage) under standard conditions (22°C, 12/12-hour light/dark cycle) with *ad libitum*  
433 access to water and a LFCD (Standard Rodent Diet 801203, Special Diets Services, United  
434 Kingdom), unless indicated otherwise. Then, based on body weight and 4-hour (9.00-13.00)  
435 fasted plasma glucose, TG and TC levels, these mice were randomized into three treatment  
436 groups (n = 18 per group), after which they received either AAV8-FGF21, a liver-tropic  
437 AAV8 capsid vector expressing FGF21 under the control of a liver specific apolipoprotein E  
438 /antitrypsin promoter (HFCD+FGF21 group;  $2 \times 10^{10}$  genome copies per mouse), or with the  
439 same genome copy number of AAV8-null ( HFCD and LFCD groups) via a single  
440 intravenous injection. After one week of recovery, mice in the HFCD+FGF21 and HFCD  
441 groups were switched to a HFCD (60% fat and 1% cholesterol; C1090-60, Altromin,  
442 Germany) and maintained on the diet for 23 weeks. An intraperitoneal glucose tolerance  
443 test (n = 8 per group) and an oral lipid tolerance test (n = 10 per group) were performed at  
444 week 16 and week 20, respectively. Flow cytometry (n = 5 per group) was conducted at  
445 week 23.

446

## 447 **Statistics**

448 Comparisons among three groups were analyzed using one-way ANOVA followed by a  
449 Tukey post-test, unless indicated otherwise. Data are presented as mean  $\pm$  SEM, and a *P*  
450 value of less than 0.05 was considered statistically significant. All statistical analyses were

451 performed with GraphPad Prism 9.01 for Windows (GraphPad Software Inc., California, CA,  
452 USA).

453

454 **Study approval**

455 All animal experiments were carried out according to the Institute for Laboratory Animal  
456 Research Guide for the Care and Use of Laboratory Animals, and were approved by the  
457 National Committee for Animal Experiments (Protocol No. AVD1160020173305) and by the  
458 Ethics Committee on Animal Care and Experimentation of the Leiden University Medical  
459 Center (Protocol No. PE.18.034.041).

460 **Acknowledgments**

461 This work was supported by the Dutch Diabetes Research Foundation (2015.81.1808 to  
462 M.R.B.); the Netherlands Organisation for Scientific Research-NWO (VENI grant 91617027  
463 to Y.W.); Chinese Scholarship Council grants (CSC 201606010321 to E.Z.); the Novo  
464 Nordisk Foundation (NNF18OC0032394 to M.S.); and the Netherlands Cardiovascular  
465 Research Initiative: an initiative with support of the Dutch Heart Foundation (CVON-  
466 GENIUS-2 to P.C.N.R.). The authors also thank T.C.M. Streefland, A.C.M. Pronk, R.A. Lalai  
467 and H.C.M. Sips from Department of Medicine, the Division of Endocrinology, Leiden  
468 University Medical Center for technical assistance.

469

470 **Conflict of interest:**

471 ACA, AP, SO, MU, IA, YI, KW and XRP are employees of AstraZeneca.

472

473 **Data availability:**

474

475 All data generated or analyzed during this study are included in the manuscript and  
476 supporting file.

477

478 **Author contributions:**

479 CL designed the study, carried out the research, analyzed and interpreted the results, and  
480 wrote and revised the manuscript. MS interpreted the results, reviewed and revised the  
481 manuscript and obtained the funding. BS and EZ carried out the research and reviewed the  
482 manuscript. JML, HJPZ and BG designed and advised the study, interpreted the results and  
483 reviewed the manuscript. MET advised the study and reviewed the manuscript. ACA, SO  
484 and KW advised the study, interpreted the results and reviewed the manuscript. AP  
485 designed AAV8-FGF21 vectors and edited the manuscript. MU and IA analyzed and

486 interpreted the results and reviewed the manuscript. YI and X-RP provided AAV8-FGF21  
487 vectors, advised the study, interpreted the results and reviewed the manuscript. MRB  
488 advised the study and reviewed the manuscript. YW designed and advised the study,  
489 interpreted the results, reviewed and revised the manuscript. PCNR designed and advised  
490 the study, interpreted the results, edited, reviewed and revised the manuscript and obtained  
491 the funding.

## 492 **References**

- 493 1. Cusi K. Role of obesity and lipotoxicity in the development of nonalcoholic steatohepatitis:  
494 pathophysiology and clinical implications. *Gastroenterology*. 2012;142(4):711-725.e6.
- 495 2. Friedman SL, et al. Mechanisms of NAFLD development and therapeutic strategies. *Nat*  
496 *Med*. 2018;24(7):908-922.
- 497 3. Arab JP, et al. Recent Insights into the Pathogenesis of Nonalcoholic Fatty Liver Disease.  
498 *Annu Rev Pathol-Mech*. 2018;13:321-350.
- 499 4. Taylor RS, et al. Association Between Fibrosis Stage and Outcomes of Patients With  
500 Nonalcoholic Fatty Liver Disease: A Systematic Review and Meta -Analysis.  
501 *Gastroenterology*. 2020;158(6):1611-1625.e12.
- 502 5. Stefan N, et al. Non-alcoholic fatty liver disease: causes, diagnosis, cardiometabolic  
503 consequences, and treatment strategies. *Lancet Diabetes Endocrinol*. 2019;7(4):313-324.
- 504 6. Musso G, et al. Recent insights into hepatic lipid metabolism in non-alcoholic fatty liver  
505 disease (NAFLD). *Prog Lipid Res*. 2009;48(1):1-26.
- 506 7. Neuschwander-Tetri BA. Hepatic lipotoxicity and the pathogenesis of nonalcoholic  
507 steatohepatitis: the central role of nontriglyceride fatty acid metabolites. *Hepatology*.  
508 2010;52(2):774-788.
- 509 8. Tacke F. Targeting hepatic macrophages to treat liver diseases. *J Hepatol*.  
510 2017;66(6):1300-1312.
- 511 9. Krenkel O, and Tacke F. Liver macrophages in tissue homeostasis and disease. *Nat Rev*  
512 *Immunol*. 2017;17(5): 306-321.
- 513 10. Tran S, et al. Impaired Kupffer Cell Self-Renewal Alters the Liver Response to Lipid  
514 Overload during Non-alcoholic Steatohepatitis. *Immunity*. 2020;53(3):627-640.e5.
- 515 11. Krenkel O, et al. Therapeutic inhibition of inflammatory monocyte recruitment reduces  
516 steatohepatitis and liver fibrosis. *Hepatology*. 2018;67(4):1270-1283.



- 517 12. Meng W, et al. The miR-182-5p/FGF21/acetylcholine axis mediates the crosstalk between  
518 adipocytes and macrophages to promote beige fat thermogenesis. *JCI Insight*.  
519 2021;6(17):e150249.
- 520 13. Guo Y, et al. Fibroblast growth factor 21 potentially inhibits microRNA-33 expression to  
521 affect macrophage actions. *Lipids Health Dis*. 2016;15(1):208.
- 522 14. Fisher FM, and Maratos-Flier E. Understanding the Physiology of FGF21. *Annu Rev*  
523 *Physiol*. 2016;78:223-241.
- 524 15. Geng L, et al. The therapeutic potential of FGF21 in metabolic diseases: from bench to  
525 clinic. *Nat Rev Endocrinol*. 2020;16(11):654-667.
- 526 16. Zhang X, et al. Serum FGF21 levels are increased in obesity and are independently  
527 associated with the metabolic syndrome in humans. *Diabetes*. 2008;57(5):1246-1253.
- 528 17. Barb D, et al. Plasma Fibroblast Growth Factor 21 Is Associated With Severity of  
529 Nonalcoholic Steatohepatitis in Patients With Obesity and Type 2 Diabetes. *J Clin*  
530 *Endocrinol Metab*. 2019;104(8):3327-3336.
- 531 18. Li H, Fang Q, Gao F, Fan J, Zhou J, Wang X, et al. Fibroblast growth factor 21 levels are  
532 increased in nonalcoholic fatty liver disease patients and are correlated with hepatic  
533 triglyceride. *J Hepatol*. 2010;53(5):934-940.
- 534 19. Flippo KH, and Potthoff MJ. Metabolic Messengers: FGF21. *Nat Metab*. 2021;3(3):309-317.
- 535 20. Sanyal A, et al. Pegbelfermin (BMS-986036), a PEGylated fibroblast growth factor 21  
536 analogue, in patients with non-alcoholic steatohepatitis: a randomised, double-blind,  
537 placebo-controlled, phase 2a trial. *Lancet*. 2019;392(10165): 2705-2717.
- 538 21. Harrison SA, et al. Efruxifermin in non-alcoholic steatohepatitis: a randomized, double-  
539 blind, placebo-controlled, phase 2a trial. *Nat Med*. 2021;27(7):1262-1271.
- 540 22. Bao LC, et al. A long-acting FGF21 alleviates hepatic steatosis and inflammation in a  
541 mouse model of non-alcoholic steatohepatitis partly through an FGF21-adiponectin-IL17A  
542 pathway. *Brit J Pharmacol*. 2018;175(16):3379-3393.

- 543 23. Morrison MC, et al. Mirtoselect, an anthocyanin-rich bilberry extract, attenuates non-  
544 alcoholic steatohepatitis and associated fibrosis in ApoE(\*) 3Leiden mice. *J Hepatol.*  
545 2015;62(5):1180-1186.
- 546 24. Liang W, Menke AL, Driessen A, Koek GH, Lindeman JH, Stoop R, et al. Establishment of  
547 a general NAFLD scoring system for rodent models and comparison to human liver  
548 pathology. *PLoS One.* 2014;9(12):e115922.
- 549 25. van den Hoek AM, et al. APOE\*3Leiden.CETP transgenic mice as model for  
550 pharmaceutical treatment of the metabolic syndrome. *Diabetes Obes Metab.*  
551 2014;16(6):537-544.
- 552 26. van der Hoorn JW, et al. The dual PPARalpha/gamma agonist tesaglitazar blocks  
553 progression of pre-existing atherosclerosis in APOE\*3Leiden.CETP transgenic mice. *Br J*  
554 *Pharmacol.* 2009;156(7):1067-1075.
- 555 27. Li Z, et al. Butyrate reduces appetite and activates brown adipose tissue via the gut-brain  
556 neural circuit. *Gut.* 2018;67(7):1269-1279.
- 557 28. Duivenvoorden I, et al. Dietary sphingolipids lower plasma cholesterol and triacylglycerol  
558 and prevent liver steatosis in APOE\*3Leiden mice. *Am J Clin Nutr.* 2006;84(2):312-321.
- 559 29. Schlein C, et al. FGF21 Lowers Plasma Triglycerides by Accelerating Lipoprotein  
560 Catabolism in White and Brown Adipose Tissues. *Cell Metab.* 2016;23(3):441-453.
- 561 30. Liu C, et al. Pharmacological treatment with FGF21 strongly improves plasma cholesterol  
562 metabolism to reduce atherosclerosis. *Cardiovasc Res.* 2022;118(2):489-502.
- 563 31. Zhang F, et al. An Adipose Tissue Atlas: An Image-Guided Identification of Human-like  
564 BAT and Beige Depots in Rodents. *Cell Metab.* 2018;27(1):252-262.e3.
- 565 32. Mulder P, et al. Surgical removal of inflamed epididymal white adipose tissue attenuates  
566 the development of non-alcoholic steatohepatitis in obesity. *Int J Obes (Lond).*  
567 2016;40(4):675-684.

- 568 33. Lin Z, et al. Adiponectin mediates the metabolic effects of FGF21 on glucose homeostasis  
569 and insulin sensitivity in mice. *Cell Metab.* 2013;17(5):779-789.
- 570 34. Machado MV, and Diehl AM. Pathogenesis of Nonalcoholic Steatohepatitis.  
571 *Gastroenterology.* 2016;150(8):1769-1777.
- 572 35. Tu H. FXR, a Bile Acid Receptor and Biological Sensor. *Trends in Cardiovascular*  
573 *Medicine.* 2000;10(1):30-35.
- 574 36. Tran S, et al. Impaired Kupffer Cell Self-Renewal Alters the Liver Response to Lipid  
575 Overload during Non-alcoholic Steatohepatitis. *Immunity.* 2020;53(3):627-640.e5.
- 576 37. Seidman JS, et al. Niche-Specific Reprogramming of Epigenetic Landscapes Drives  
577 Myeloid Cell Diversity in Nonalcoholic Steatohepatitis. *Immunity.* 2020;52(6):1057-1074.e7.
- 578 38. Blieriot C, et al. A subset of Kupffer cells regulates metabolism through the expression of  
579 CD36. *Immunity.* 2021;54(9):2101-2116.e6.
- 580 39. Daemen S, et al. Dynamic Shifts in the Composition of Resident and Recruited  
581 Macrophages Influence Tissue Remodeling in NASH. *Cell Rep.* 2021;34(2):108626.
- 582 40. Ramachandran P, et al. Resolving the fibrotic niche of human liver cirrhosis at single-cell  
583 level. *Nature.* 2019;575(7783):512-518.
- 584 41. Aggarwal P, et al. Nonalcoholic steatohepatitis (NASH) cirrhosis: a snapshot of therapeutic  
585 agents in clinical development and the optimal design for clinical trials. *Expert Opin Inv*  
586 *Drug.* 2022, 31(2):163-172.
- 587 42. Bril F, et al. Metabolic and histological implications of intrahepatic triglyceride content in  
588 nonalcoholic fatty liver disease. *Hepatology.* 2017;65(4):1132-1144.
- 589 43. Armstrong MJ, et al. Glucagon-like peptide 1 decreases lipotoxicity in non-alcoholic  
590 steatohepatitis. *J Hepatol.* 2016;64(2):399-408.
- 591 44. Ratziu V, et al. Aramchol in patients with nonalcoholic steatohepatitis: a randomized,  
592 double-blind, placebo-controlled phase 2b trial. *Nat Med.* 2021;27(10):1825-1835.

- 593 45. Zarei M, et al. Targeting FGF21 for the Treatment of Nonalcoholic Steatohepatitis. *Trends*  
594 *Pharmacol Sci.* 2020;41(3):199-208.
- 595 46. Nishimura T, Nakatake Y, Konishi M, and Itoh N. Identification of a novel FGF, FGF-21,  
596 preferentially expressed in the liver. *Biochim Biophys Acta.* 2000;1492(1):203-206.
- 597 47. Markan KR, et al. Circulating FGF21 Is Liver Derived and Enhances Glucose Uptake  
598 During Refeeding and Overfeeding. *Diabetes.* 2014;63(12):4057-4063.
- 599 48. Berbee JF, et al. Brown fat activation reduces hypercholesterolaemia and protects from  
600 atherosclerosis development. *Nat Commun.* 2015;6:6356.
- 601 49. Yang Q, et al. Metabolites as regulators of insulin sensitivity and metabolism. *Nat Rev Mol*  
602 *Cell Biol.* 2018;19(10):654-672.
- 603 50. Fisher FM, et al. Fibroblast growth factor 21 limits lipotoxicity by promoting hepatic fatty  
604 acid activation in mice on methionine and choline-deficient diets. *Gastroenterology.*  
605 2014;147(5):1073-83.e6.
- 606 51. Keinicke H, et al. FGF21 regulates hepatic metabolic pathways to improve steatosis and  
607 inflammation. *Endocr Connect.* 2020;9(8):755-768.
- 608 52. Zhang J, et al. Chronic Over-expression of Fibroblast Growth Factor 21 Increases Bile  
609 Acid Biosynthesis by Opposing FGF15/19 Action. *EBioMedicine.* 2017;15:173-183.
- 610 53. Luo Y, et al. Pegbelfermin selectively reduces secondary bile acid concentrations in  
611 patients with non-alcoholic steatohepatitis. *JHEP Rep.* 2021;4(1):100392.
- 612 54. Cai J, et al. The Role of Innate Immune Cells in Nonalcoholic Steatohepatitis. *Hepatology.*  
613 2019;70(3):1026-1037.
- 614 55. Remmerie A, et al. Osteopontin Expression Identifies a Subset of Recruited Macrophages  
615 Distinct from Kupffer Cells in the Fatty Liver. *Immunity.* 2020;53(3):641-657.e14.
- 616 56. Schwabe RF, et al. Mechanisms of Fibrosis Development in Nonalcoholic Steatohepatitis.  
617 *Gastroenterology.* 2020;158(7):1913-1928.

618 57. Yu Y, et al. STING-mediated inflammation in Kupffer cells contributes to progression of  
619 nonalcoholic steatohepatitis. *J Clin Invest.* 2019;129(2):546-555.

620 58. Heyens LJM, et al. Liver Fibrosis in Non-alcoholic Fatty Liver Disease: From Liver Biopsy  
621 to Non-invasive Biomarkers in Diagnosis and Treatment. *Front Med (Lausanne).*  
622 2021;8:615978.

623 59. Westerterp M, et al. Cholesteryl ester transfer protein decreases high-density lipoprotein  
624 and severely aggravates atherosclerosis in APOE\*3-Leiden mice. *Arterioscler Thromb Vasc*  
625 *Biol.* 2006;26(11):2552-2559.

626

627 **Figure legends:**

628 **Figure 1. Liver-specific FGF21 overexpression increases circulating FGF21 levels**

629 **and protects against HFCD-induced body fat mass gain. (A)** Experimental set up. **(B)** At

630 week 23, FGF21 mRNA expression in the liver and gWAT was quantified (n = 16-18).

631 Plasma FGF21 levels were measured before (at week -1; pooled samples, n = 6 per group)

632 and after (at week 4, pooled samples, n = 6 per group; week 23, n = 12-16 per group)

633 AAV8-FGF21 administration. **(C)** Body weight was monitored throughout the experimental

634 period (n = 17-18). **(D)** At week 23, brown adipose tissue (BAT) and white adipose tissue

635 (WAT) depots were isolated and weighed (n = 18). Data are shown as mean  $\pm$  SEM.

636 Differences were assessed using one-way ANOVA followed by a Tukey post-test. \* $P < 0.05$ ;

637 \*\* $P < 0.01$ , \*\*\* $P < 0.001$ , compared with the LFCD group. #### $P < 0.001$ , compared with the

638 HFCD group. AAV8, adeno-associated virus 8; FGF21, fibroblast growth factor 21; gWAT,

639 gonadal WAT; HFCD, high fat and high cholesterol diet; iBAT, interscapular BAT; LFCD,

640 low fat and low cholesterol diet; sBAT, subscapular BAT; sWAT, subcutaneous white

641 adipose tissue.

642

643 **Figure 2. FGF21 protects against HFCD-induced adipose tissue dysfunction. (A)** In

644 iBAT, the lipid content and expression of uncoupling protein-1 (UCP-1) were quantified after

645 H&E staining and UCP-1 immunostaining, respectively. **(B)** In sWAT, the adipocyte

646 enlargement was assessed by H&E staining, and the tissue browning was evaluated by

647 UCP-1 immunostaining. **(C)** In gWAT, the adipocyte hypertrophy was detected, and the

648 number of CLSs was assessed, and **(D)** mRNA expression of pro-inflammatory markers

649 was quantified. **(E)** Plasma adiponectin concentration in fasted blood plasma was

650 measured at week 22. **(A)-(D)**, n = 14-18 per group; **(E)**, n = 10 per group. Differences were

651 assessed using one-way ANOVA followed by a Tukey post-test. \* $P < 0.05$ , \*\*\* $P < 0.001$ ,

652 compared with the LFCD group.  $^{\#}P < 0.05$ ,  $^{\#\#}P < 0.01$ ,  $^{\#\#\#}P < 0.001$ , compared with the  
653 HFCD group. *Adgre1*, adhesion G protein-coupled receptor E1; *Tnfa*, tumor necrosis factor  
654  $\alpha$ ; *Il1b*, interleukin-1 $\beta$ ; *Ccl2*, chemokine C–C motif ligand 2.

655

656 **Figure 3. FGF21 alleviates HFCD-induced hyperglycemia and hypertriglyceridemia. (A)**

657 Fasting plasma glucose levels were measured during the experimental period. **(B)** At week

658 16, an intraperitoneal glucose tolerance test (IPGTT) was initiated. **(B)** The area under the

659 curve (AUC) of plasma glucose during the IPGTT and **(C)** plasma insulin concentration in

660 response to the IPGTT was determined at the indicated timepoints. **(C)** Homeostasis model

661 assessment of insulin resistance (HOMA-IR) was determined from fasting glucose and

662 insulin levels. **(D)** Fasting plasma TG levels were measured throughout the study. The

663 distribution of triglyceride over lipoproteins was determined (pooled samples; n = 5 per

664 group) from plasma of week 22. **(E)** At week 20, an oral lipid tolerance test (OLTT) was

665 initiated, and AUC of plasma TG during the OLTT was calculated. **(A and D)**, n = 14-18 per

666 group; **(B-C)**, n = 7-8 per group; **(E)**, n = 6-9 per group. Data are shown as mean  $\pm$  SEM.

667 Differences were assessed using one-way ANOVA followed by a Tukey post-test.  $^*P <$

668  $0.05$ ,  $^{**}P < 0.01$ ,  $^{***}P < 0.001$ , compared with the LFCD group.  $^{\#}P < 0.05$ ,  $^{\#\#}P < 0.01$ ,  $^{\#\#\#}P <$

669  $0.001$ , compared with the HFCD group.

670

671 **Figure 4. FGF21 protects against HFCD-induced hepatic steatosis, inflammation and**

672 **fibrosis. (A)** At week 23, liver weight was determined, and **(B)** scoring of histological

673 features of steatosis, lobular inflammation and ballooning as well as **(C)** NAFLD activity was

674 evaluated by H&E staining. **(D)** Liver fibrosis was assessed by Picrosirius Red (PSR)

675 staining, and **(E)** hepatic hydroxyproline levels were determined. **(F)** Representative

676 macroscopic, H&E and PSR pictures are shown. Data are shown as mean  $\pm$  SEM (n = 16-

677 18 per group). Differences were assessed using one-way ANOVA followed by a Tukey

678 post-test. \* $P < 0.05$ ; \*\* $P < 0.01$ , \*\*\* $P < 0.001$ , compared with the LFCD group. ## $P < 0.01$ ;  
679 ### $P < 0.001$ , compared with the HFCD group.

680

681 **Figure 5. FGF21 abolishes liver lipotoxicity, accompanied by activation of hepatic**  
682 **signaling involved in FA oxidation and cholesterol removal. (A)** Triglyceride (TG), total  
683 cholesterol (TC) and phospholipid (PL) levels were determined in the liver (n = 18 per  
684 group), and representative Oil Red O (ORO) pictures are shown. **(B)** The relative mRNA  
685 expression of genes involved in fatty acid oxidation and **(C and D)** cholesterol removal (n =  
686 15-18 per group) were determined in the liver. Data are shown as mean  $\pm$  SEM. Differences  
687 were assessed using one-way ANOVA followed by a Tukey post-test. \*\* $P < 0.01$ , \*\*\* $P <$   
688  $0.001$ , compared with the LFCD group. ### $P < 0.001$ , compared with the HFCD group.  
689 *Abcg5*, ATP-binding cassette transporter G member 5; *Cpt1a*, carnitine palmitoyl  
690 transferase 1 $\alpha$ ; *Cyp7a1*, cholesterol 7 $\alpha$ -hydroxylase; *Cyp8b1*, sterol 12 $\alpha$ -hydroxylase;  
691 *Cyp27a1*, sterol 27-hydroxylase; *Pgc1a*, peroxisome proliferator-activated receptor gamma  
692 coactivator 1 $\alpha$ ; *Ppara*, peroxisome proliferator-activated receptor  $\alpha$ .

693

694 **Figure 6. FGF21 modulates hepatic macrophage pool and protects against COL1A1**  
695 **accumulation, as predicted by the reduction of CD36<sup>hi</sup> KCs and CD9<sup>hi</sup> KCs. (A)** Uniform  
696 manifold approximation and projection for dimension reduction (UMAP) of immune cell  
697 subsets from livers after 23-week of intervention. **(B)** The number of resident KCs (ResKCs),  
698 the proportion of CD11c<sup>+</sup> ResKCs, and the expression of CD36 and CD9 in ResKCs were  
699 quantified. **(C)** The amount of monocyte-derived KCs (MoKCs) was assessed, the  
700 percentage of CD11c<sup>+</sup> MoKCs was determined, the CD36 and CD9 expression levels in  
701 MoKCs were quantified. **(D)** Hepatic inflammation was evaluated by pro-inflammatory gene  
702 expression and the formation of CLSs within the liver. The mRNA expression of liver



703 fibrogenesis markers was quantified, and the protein expression of collagen type 1 $\alpha$  1  
704 (COL1A1) was determined. (E) The expression of CD36 in ResKCs, and the expression of  
705 CD9 and CD36 in MoKCs were plotted against COL1A1-positive area in the liver. (F)  
706 Mechanistic model. Data are shown as mean  $\pm$  SEM (A-B and E, n = 4-5 per group; D, n =  
707 16-18 per group). Linear regression analyses were performed. Differences were assessed  
708 using one-way ANOVA followed by a Fisher's LSD test. \* $P$  < 0.05, \*\* $P$  < 0.01, \*\*\* $P$  < 0.001,  
709 compared with the LFCD group. # $P$  < 0.05, ## $P$  < 0.01, ### $P$  < 0.001, compared with the  
710 HFCD group. *Acta2*, actin  $\alpha$  2; *Ctgf*, connective tissue growth factor; FA, fatty acid; *Tgfb1*,  
711 transforming growth factor- $\beta$ .

712

#### 713 **Figure supplements:**

714 **Figure 2-figure supplement 1. Liver-specific FGF21 overexpression tends to**  
715 **upregulate mRNA expression of FGF21 receptor 1 (FGFR1) and co-receptor  $\beta$ -Klotho**  
716 **(KLB) in white adipose tissue (WAT).** The mRNA expression of KLB and FGFR1 in  
717 gonadal WAT (gWAT). Data are shown as mean  $\pm$  SEM (n = 16-18 per group). Differences  
718 were assessed using one-way ANOVA followed by a Tukey post-test.

719

720 **Figure 3-figure supplement 1. HFCD increases fasting cholesterol levels.** (A) Fasting  
721 plasma total cholesterol (TC) levels were measured over a 23-week intervention period (n =  
722 14-18 per group), and (B) the distribution of the cholesterol over circulating lipoproteins was  
723 assessed at week 22 (pooled samples; n = 18 per group). Data are shown as mean  $\pm$  SEM.  
724 Differences were assessed using one-way ANOVA followed by a Tukey post-test. \*\*\* $P$  <  
725 0.001, compared with the LFCD group. VLDL, very low-density lipoprotein; LDL, low-density  
726 lipoprotein; HDL, high-density lipoprotein.

727

728 **Figure 4-figure supplement 1. FGF21 abolishes HFCD-induced increase of hepatic**  
729 **lipid-positive area and the number of inflammatory foci.** At week 23, (A) hepatic lipid  
730 droplet content and (B) inflammatory foci numbers were assessed by H&E staining. Data  
731 are shown as mean  $\pm$  SEM (n = 18 per group). Differences were assessed using one-way  
732 ANOVA followed by a Tukey post-test.  $**P < 0.01$ ,  $***P < 0.001$ , compared with the LFCD  
733 group.  $\#P < 0.01$   $###P < 0.001$ , compared with the HFCD group.

734

735 **Figure 5-figure supplement 1. Liver-specific FGF21 overexpression upregulates**  
736 **hepatic mRNA expression of FGF21 receptors (FGFRs) and co-receptor  $\beta$ -Klotho**  
737 **(KLB).** The mRNA levels of KLB and FGFRs in the liver. Data are shown as mean  $\pm$  SEM  
738 (n = 14-18 per group). Differences were assessed using one-way ANOVA followed by a  
739 Tukey post-test.  $*P < 0.05$ ,  $**P < 0.01$ ,  $***P < 0.001$ , compared with the LFCD group.  $\#P <$   
740  $0.01$ ,  $###P < 0.001$ , compared with the HFCD group.

741

742 **Figure 5-figure supplement 2. FGF21 increases apolipoprotein B mRNA (*Apob*)**  
743 **expression in the liver.** At end of the study, hepatic expression of genes involved in (A)  
744 fatty acid uptake and (B) VLDL production was quantified (n = 15-18 per group). Data are  
745 shown as mean  $\pm$  SEM. Differences were assessed using one-way ANOVA followed by a  
746 Tukey post-test.  $***P < 0.001$ , compared with the LFCD group.  $###P < 0.001$ , compared with  
747 the HFCD group. *Apob*, apolipoprotein B; *Cd36*, cluster of differentiation 36; *Mttp*,  
748 microsomal triglyceride transfer protein.

749

750 **Figure 6-figure supplement 1. FGF21 modulates the hepatic immune cell pool. (A)**  
751 **Flow cytometry gating strategy. (B)** After 23 weeks of treatment, CD45<sup>+</sup> cells were isolated  
752 from the liver, and the number of CD45<sup>+</sup> cells, eosinophils, neutrophils, B cells, dendritic  
753 cells (DCs), T cells, natural killer (NK) cells, total Kupffer cells (KCs), Ly6C<sup>hi</sup> monocytes and

754 monocyte-derived macrophages (MoDMacs) was assessed. Data are shown as mean  $\pm$   
755 SEM ( n = 4-5 per group). Differences were assessed using one-way ANOVA followed by a  
756 Fisher's LSD test. \* $P < 0.05$ , \*\* $P < 0.01$ , compared with the LFCD group. # $P < 0.05$ , ## $P <$   
757 0.01, compared with the HFCD group.

758

759 **Figure 6-figure supplement 2. CD36<sup>hi</sup> ResKCs as well as CD36<sup>hi</sup>/CD9<sup>hi</sup> MoKCs**  
760 **positively correlate with NAFLD activity score and liver fibrosis.** NAFLD activity scores  
761 and liver hydroxyproline levels were plotted against the expression of **(A)** CD9 and **(B)**  
762 CD36 in ResKCs as well as **(C)** CD9 and **(D)** CD36 in MoKCs. **(E)** Hepatic expression of  
763 collagen type 1 $\alpha$  1 (COL1A1) was plotted against the expression of CD9 in ResKCs. Linear  
764 regression analyses were performed. Data are represented as mean  $\pm$  SEM (n = 5 per  
765 group).

766

767 **List of Supplementary Files:**

768 **Supplementary File 1: Supporting Materials and Methods.**

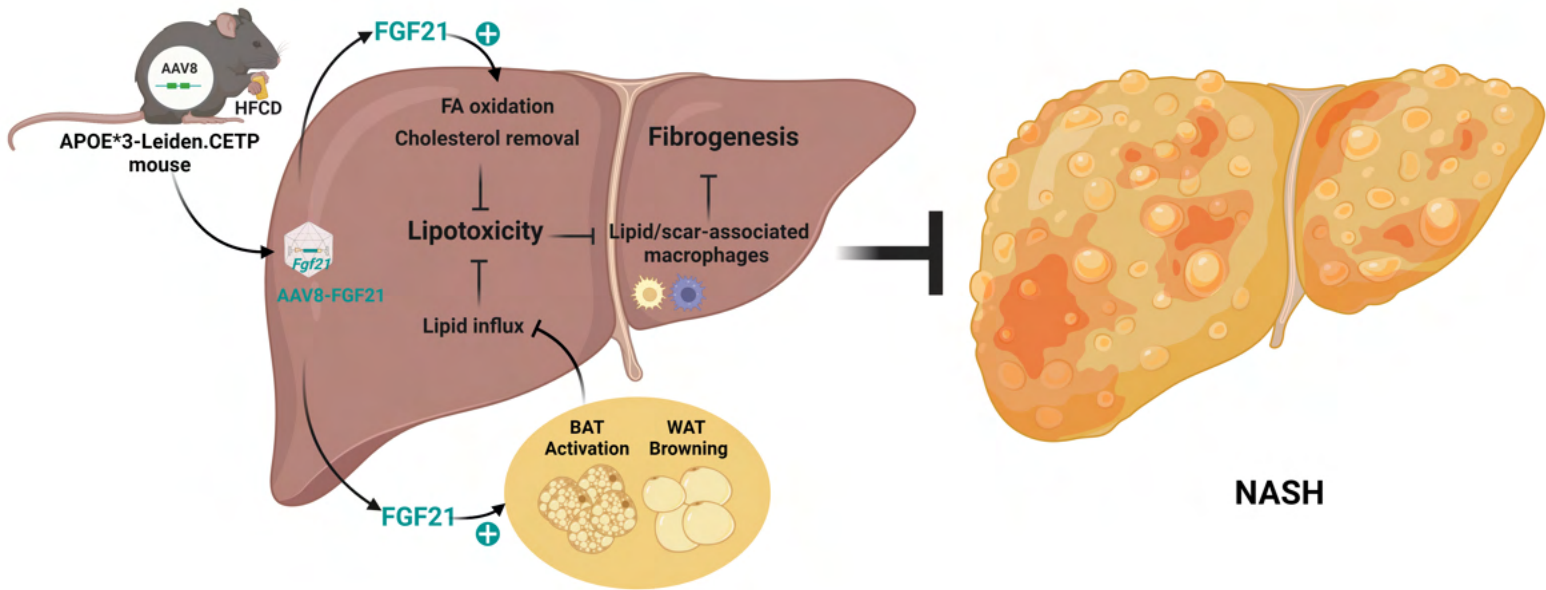

Figure 1

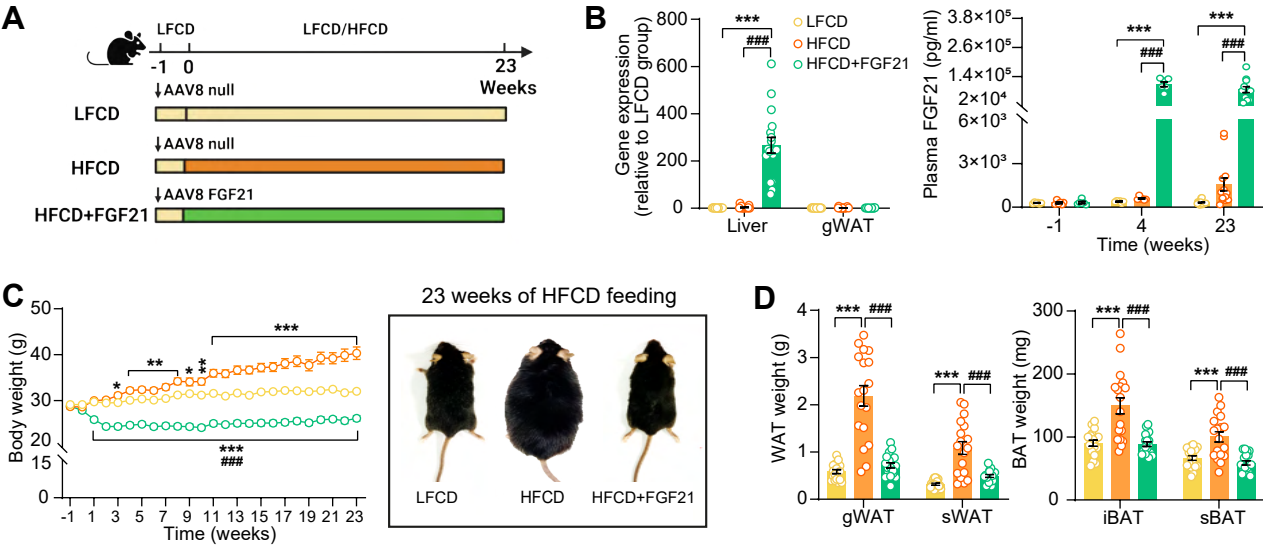

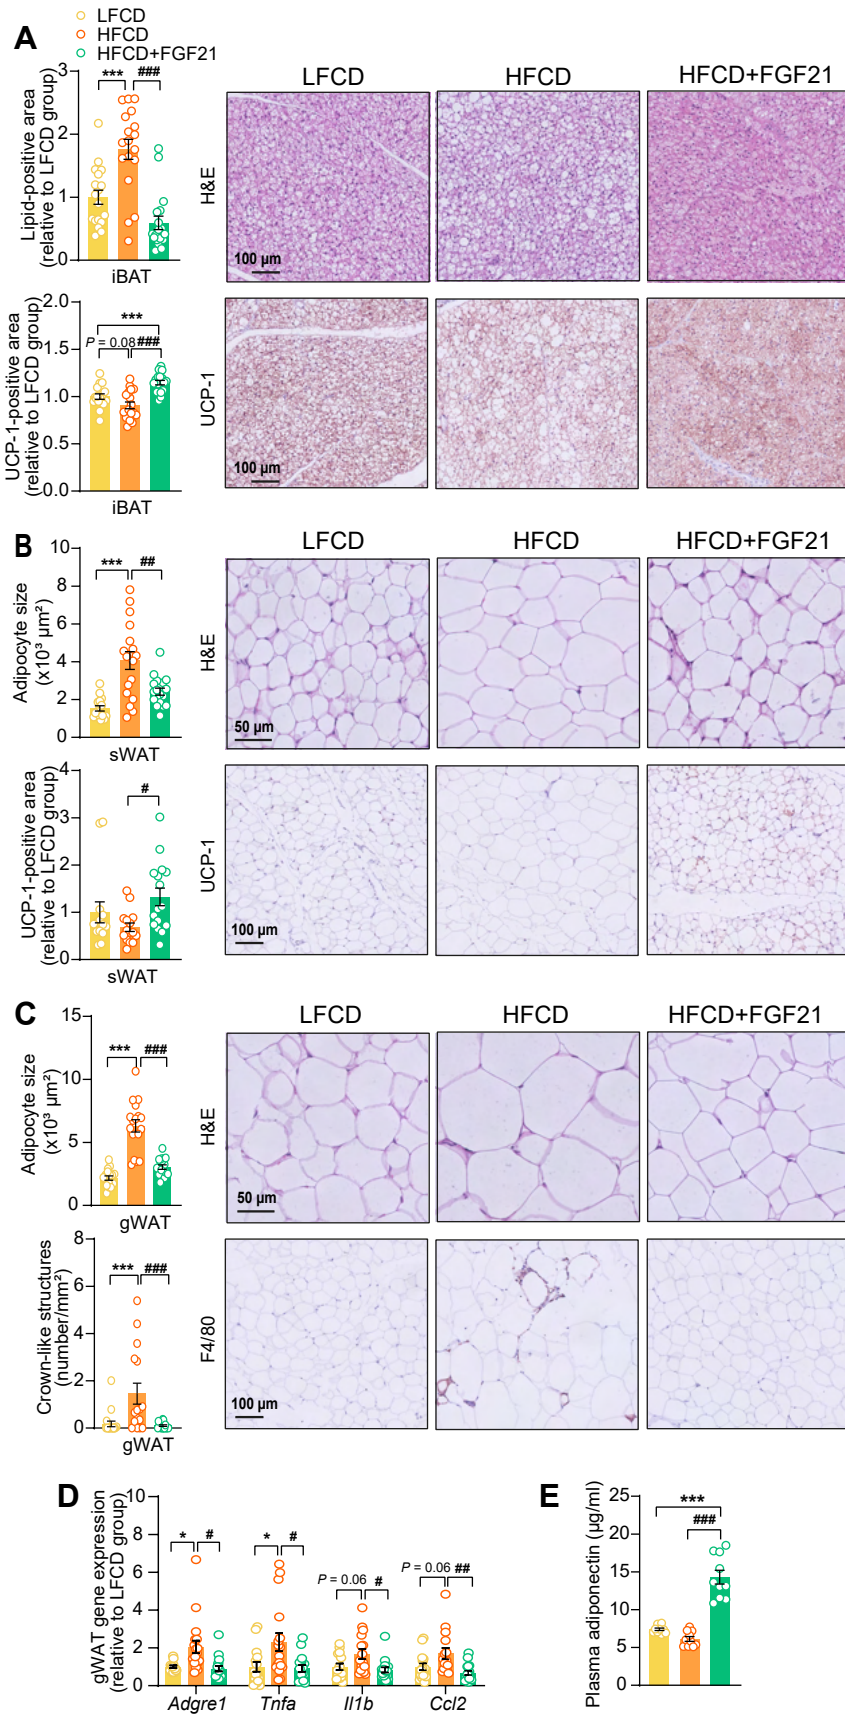

Figure 3

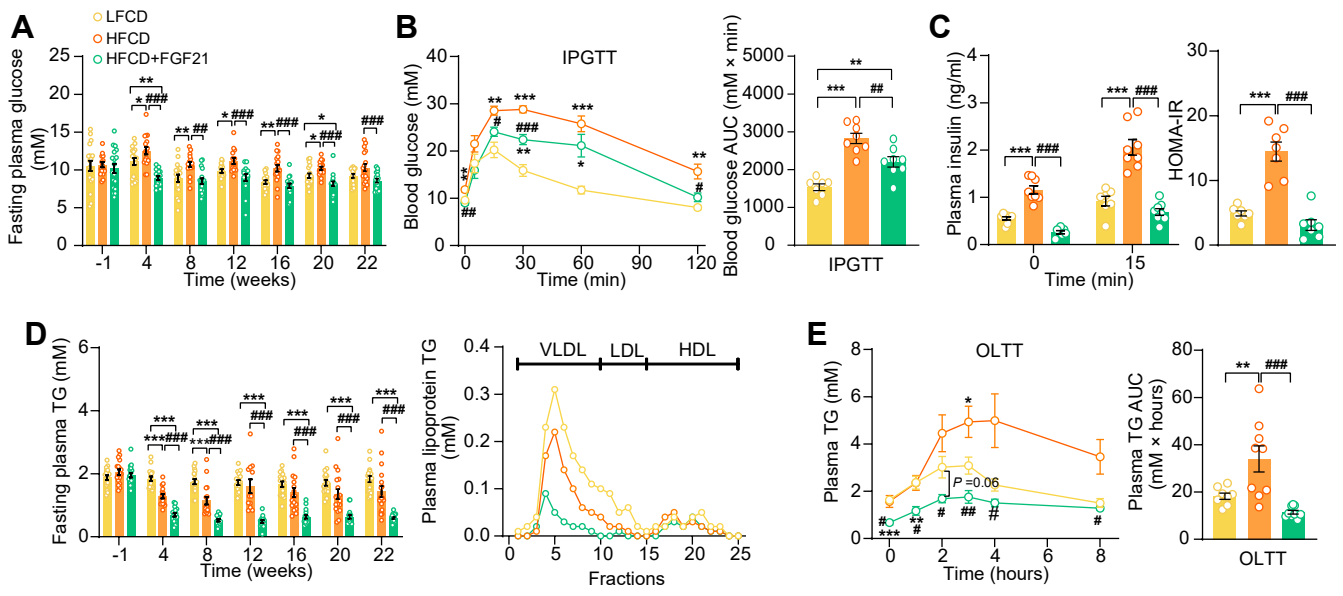

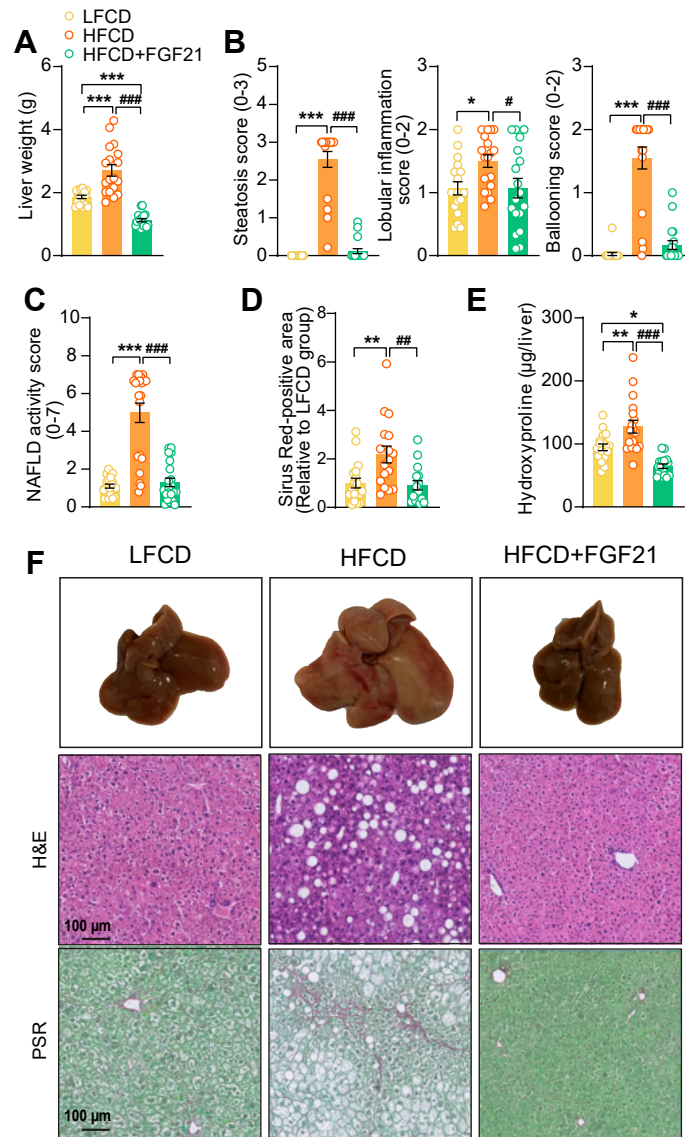



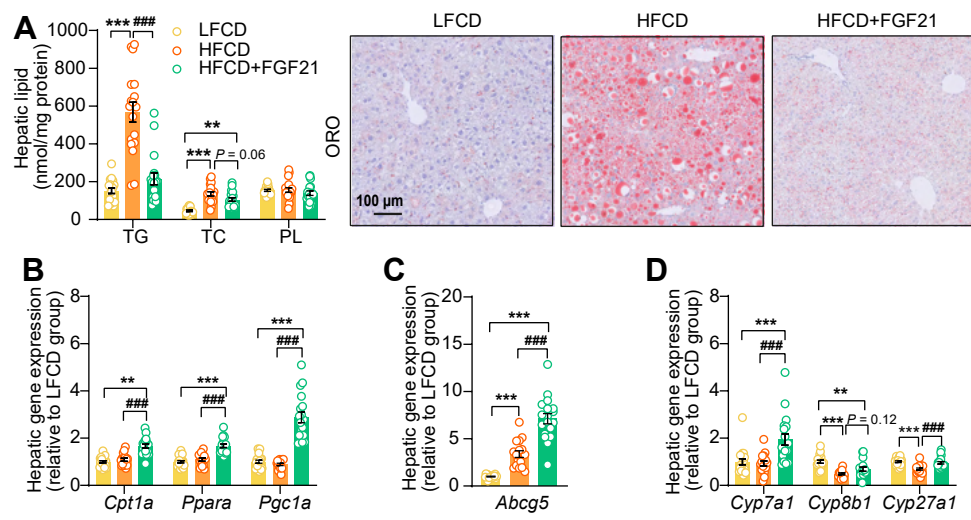

Figure 6

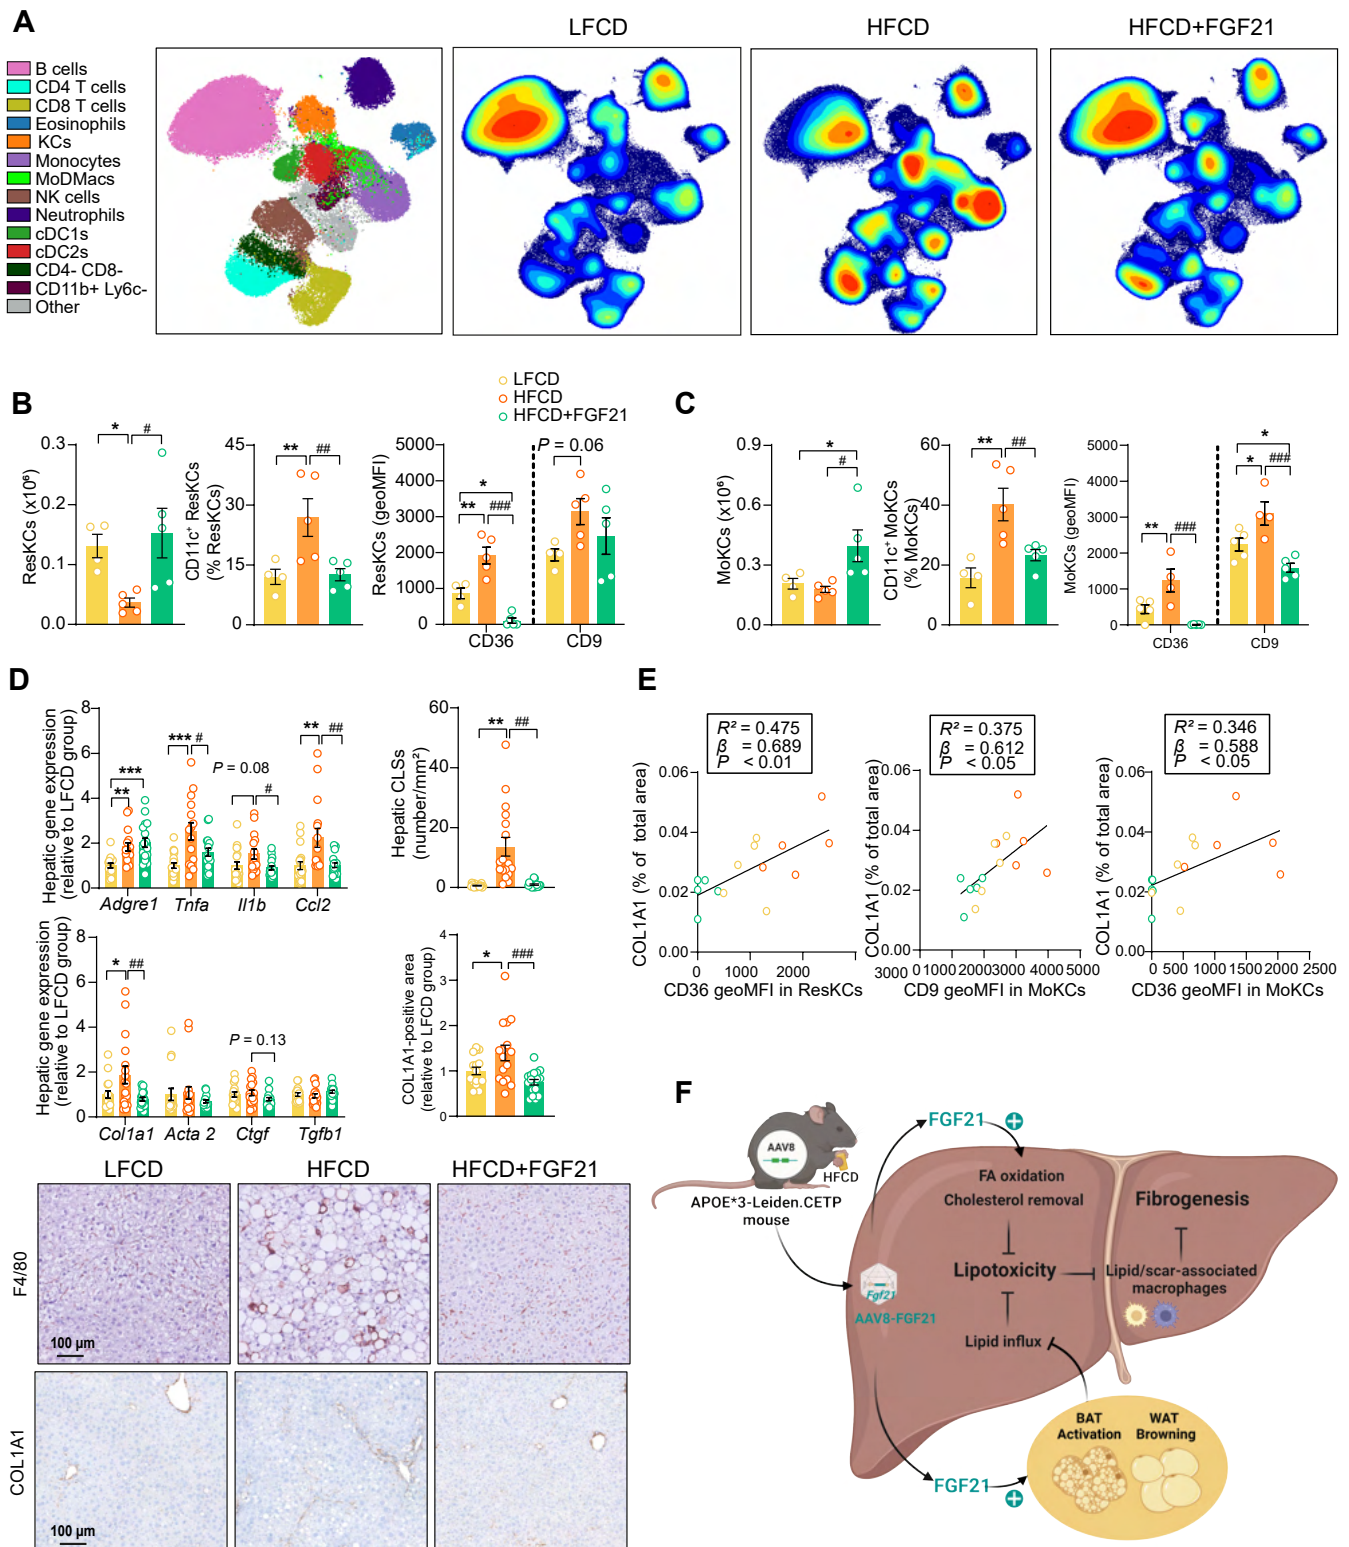

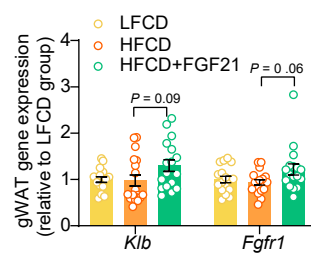

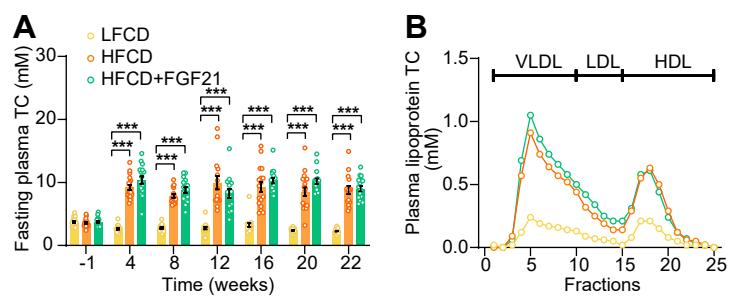

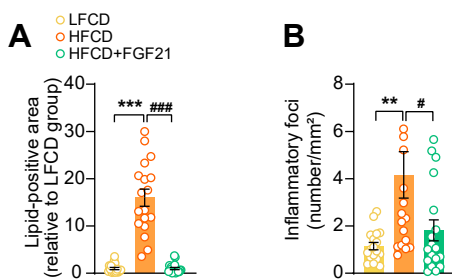

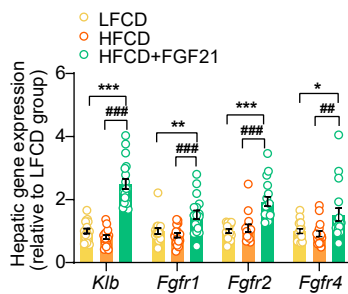

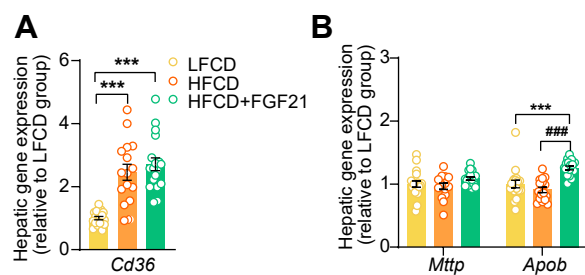

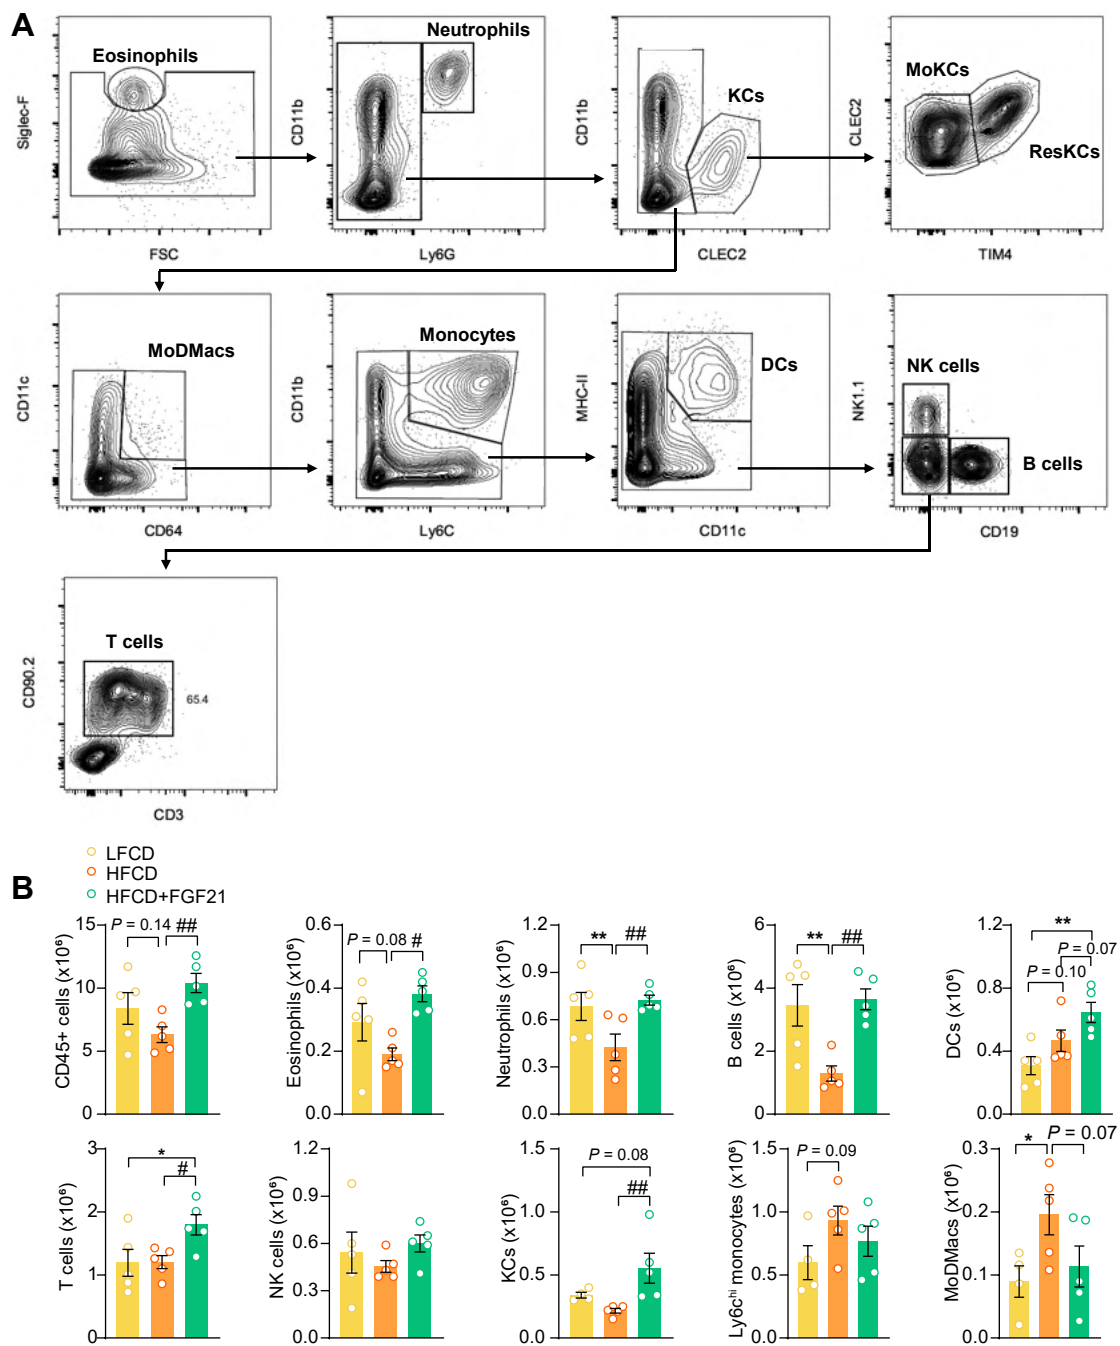



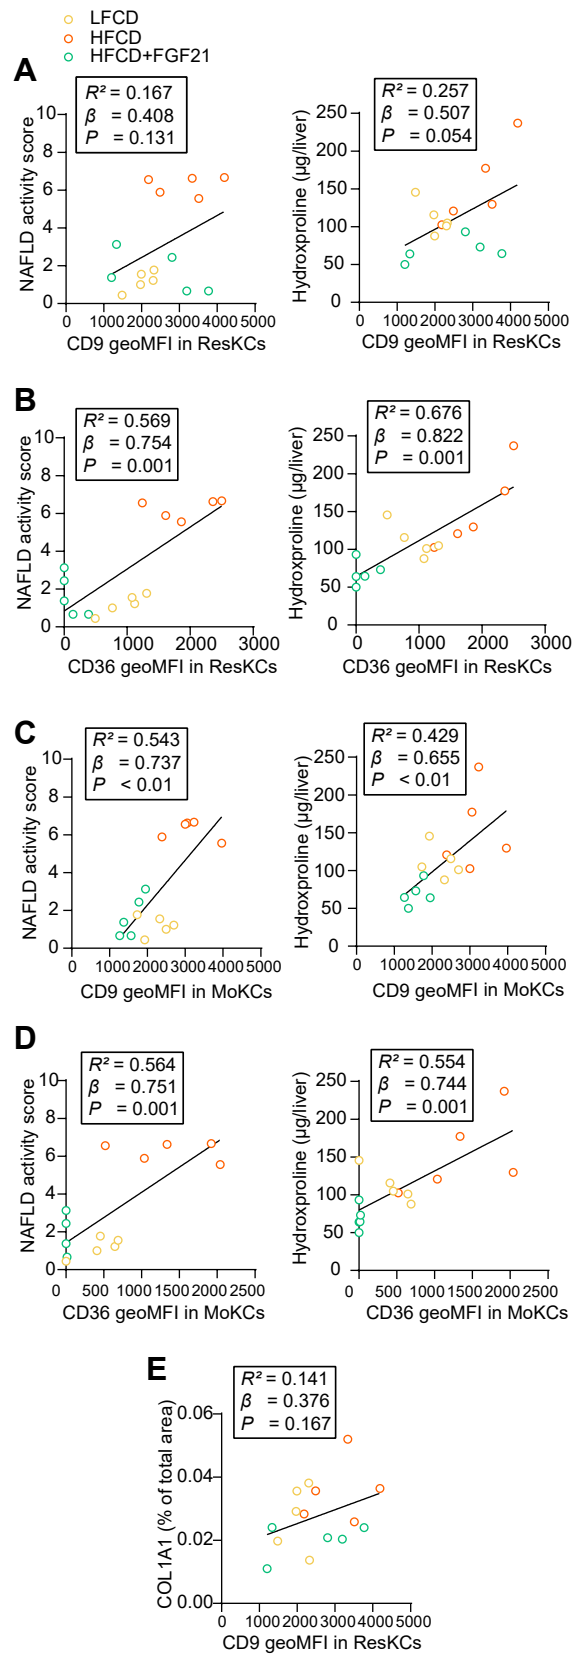

Source: https://www.biorxiv.org/content/10.1101/2022.09.20.508654.full.pdf
